# Supplementary material for: The basal translation rate of authentic HIV-1 RNA is regulated by 5’UTR nt-pairings at junction of R and U5
Source: PubMed Central journal article supplement (PMC5537239; doi:10.1038/s41598-017-06883-9), 2017-07-31
Supplement: 41598_2017_6883_MOESM1_ESM.pdf [file 41598_2017_6883_MOESM1_ESM.pdf]

**The basal translation rate of authentic HIV-1 RNA is regulated by 5'UTR nt-pairings at junction of R and U5**

Boeras, I<sup>1</sup>., Seufzer, B.<sup>1</sup>, Brady, S.<sup>2</sup>, Rendahl, A.<sup>1</sup>, Heng, X.<sup>2\*</sup>, and K. Boris-Lawrie<sup>1\*</sup>

\* Corresponding authors.

<sup>1</sup> University of Minnesota, Dept of Veterinary and Biomedical Sciences, 1971 Commonwealth, Saint Paul, MN 55108 USA

<sup>2</sup>University of Missouri, Dept of Biochemistry, 503 S. College Ave, Columbia, MO 65211 USA

## Supplementary figure legends

### Figure S1. Flowchart of process to measure translation rate.

De novo translation activity of mRNA templates was measured by the incorporation of radiolabeled amino acids into nascent polypeptides at 3 consecutive intervals. Gag and beta-Catenin were collected by IP and analyzed by SDS-PAGE. Radiolabeled protein was quantified by phosphorimaging. Drawing made by Ioana Boeras and Kathleen Boris-Lawrie.

**Figure S2. Entire gel of the metabolic labeling assay in Fig. 2.** SDS-PAGE and phosphorimager analysis of <sup>35</sup>S-labeled immunoprecipitated Gag polypeptides (Gag-Pol, Gag precursor, and processed capsid). Beta-Catenin was co-precipitated with exception of the SubB U103C sample, as designated by asterisk. M indicates the lane containing the molecular weight markers (KDa).

**Figure S3. Six representative ribosomal RNA profiles.** Continuous sucrose gradients of cytoplasmic extracts of HEK293 cells were prepared and distribution of ribosomal RNA was monitored at 254nm.

### Figure S4. Monomer-dimer equilibrium assay of WT and U103C 5'UTRs.

In vitro transcribed RNAs corresponding to HIV 5'UTR (+1 to 356) were incubated in physiologic ionic strength buffer to equilibrium and visualized by native agarose electrophoresis.

**Table S1. Rate of amino acid incorporation to Gag polypeptide is sensitive to U103 substitution in monomer-prone 5'UTR mutants <sup>a</sup>.**

| <b>Molecular clone</b><br><b>[Predominant conformer]<sup>b</sup></b> | <b>Gag fold difference</b><br><b>relative to WT</b><br><b>(Average ± standard error)</b> | <b>p-value</b> | <b>beta-Catenin fold</b><br><b>difference relative to WT</b><br><b>(Average ± standard error)</b> | <b>p-value</b> |
|----------------------------------------------------------------------|------------------------------------------------------------------------------------------|----------------|---------------------------------------------------------------------------------------------------|----------------|
| WT<br>[Dimer]                                                        | 1.0                                                                                      | Baseline       | 1.0                                                                                               | Baseline       |
| SubC<br>[Dimer]                                                      | 1.1 ± 0.2                                                                                | 0.9319         | 2.8 ± 0.9                                                                                         | 0.0096         |
| SubA<br>[Monomer]                                                    | 0.7 ± 0.2                                                                                | 0.5592         | 0.8 ± 0.2                                                                                         | 0.9439         |
| SubB<br>[Monomer]                                                    | 0.8 ± 0.2                                                                                | 0.7829         | 1.1 ± 0.3                                                                                         | 0.9861         |
| SubA U103G<br>[Monomer]                                              | 3.1 ± 0.6                                                                                | 0.0001         | 1.9 ± 0.6                                                                                         | 0.1715         |
| SubB U103C<br>[Monomer]                                              | 2.6 ± 1.0                                                                                | 0.0541         | NA                                                                                                | NA             |

<sup>a</sup> Average fold difference (± standard error) of de novo Gag and beta-Catenin synthesis over the three time points for each molecular clone relative to WT. Results of three to ten independent experiments were back-transformed from the linear mixed model and standard error was computed by the delta method; p-values adjusted for multiple comparisons by Dunnett's method.

<sup>b</sup> Predominant conformation observed in monomer:dimer equilibrium assay (Figure 1).

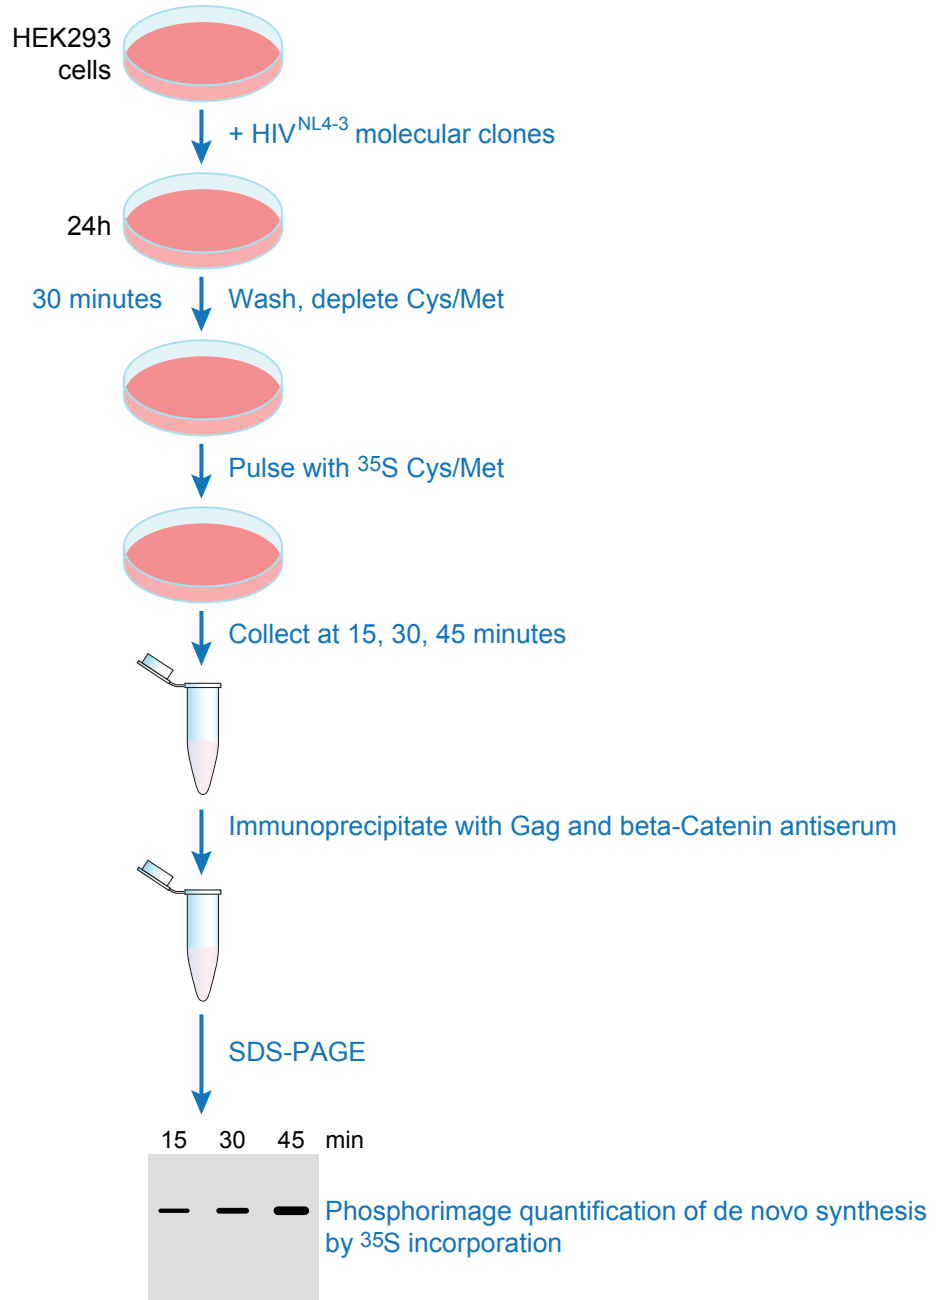

Figure S1



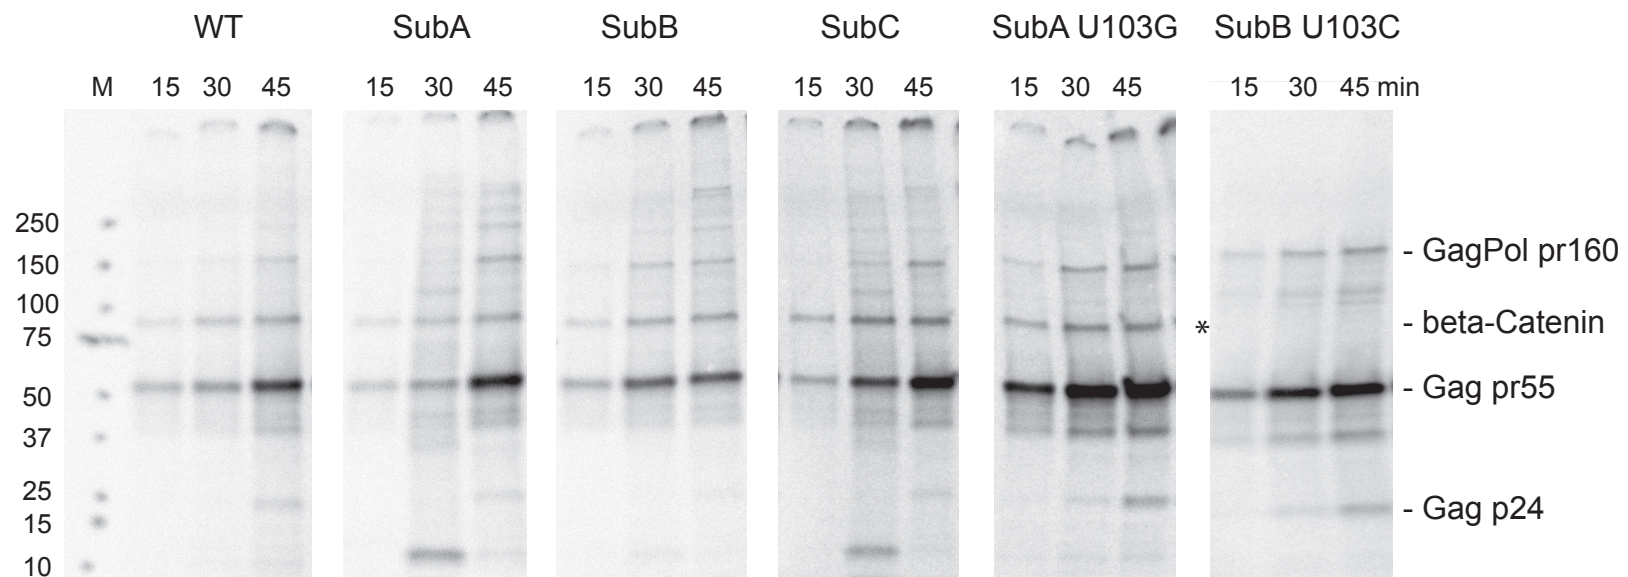

Figure S2

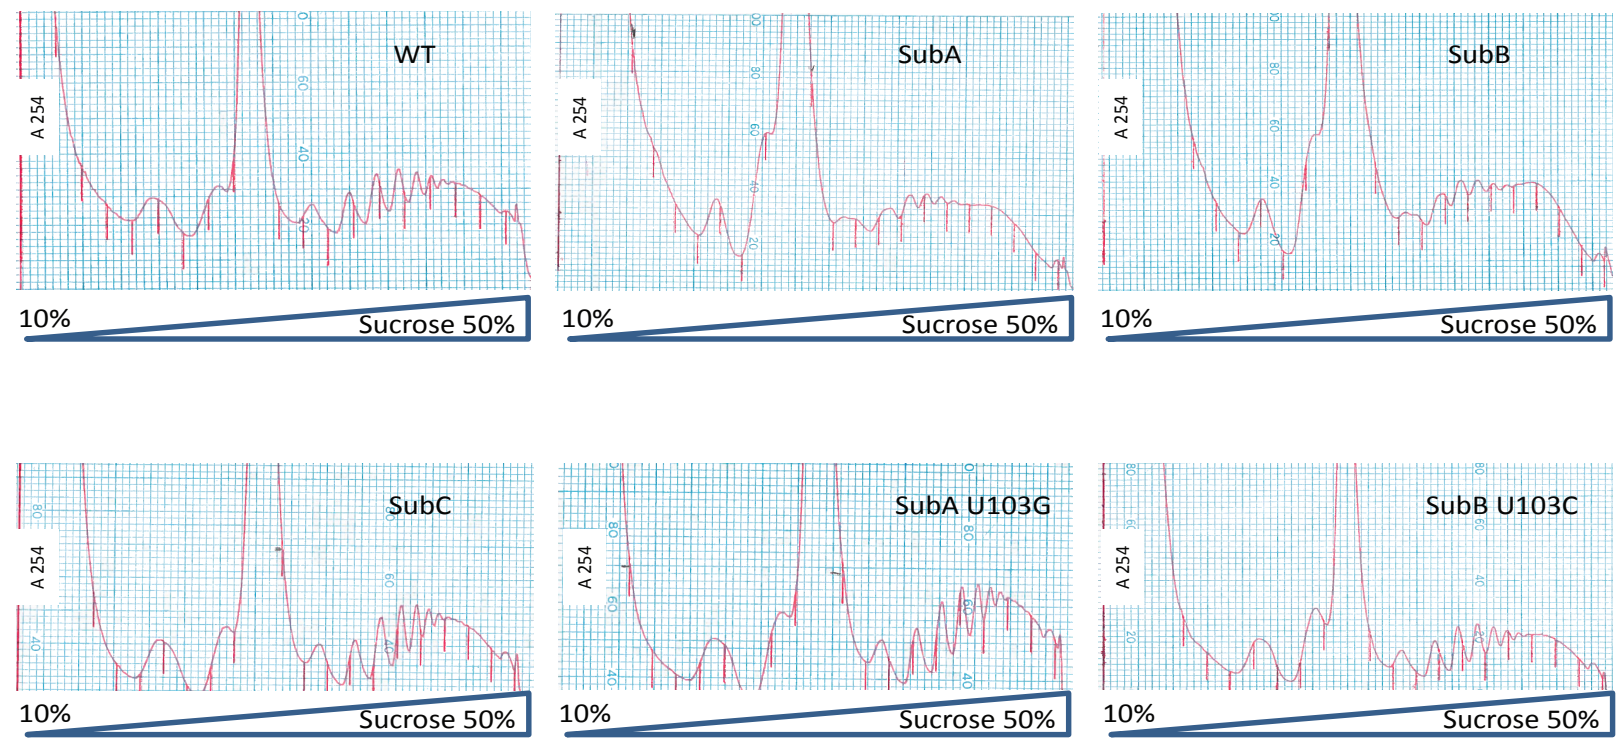

Figure S3

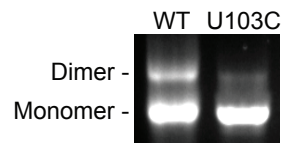

Figure S4
